# Supplementary material for: Identification of cell lines CL-14, CL-40 and CAL-51 as suitable models for SARS-CoV-2 infection studies
Source: PubMed Central journal article supplement (PMC8328321; doi:10.1371/journal.pone.0255622), 2021-08-02
Supplement: pone.0255622.s001.pdf [file pone.0255622.s001.pdf]

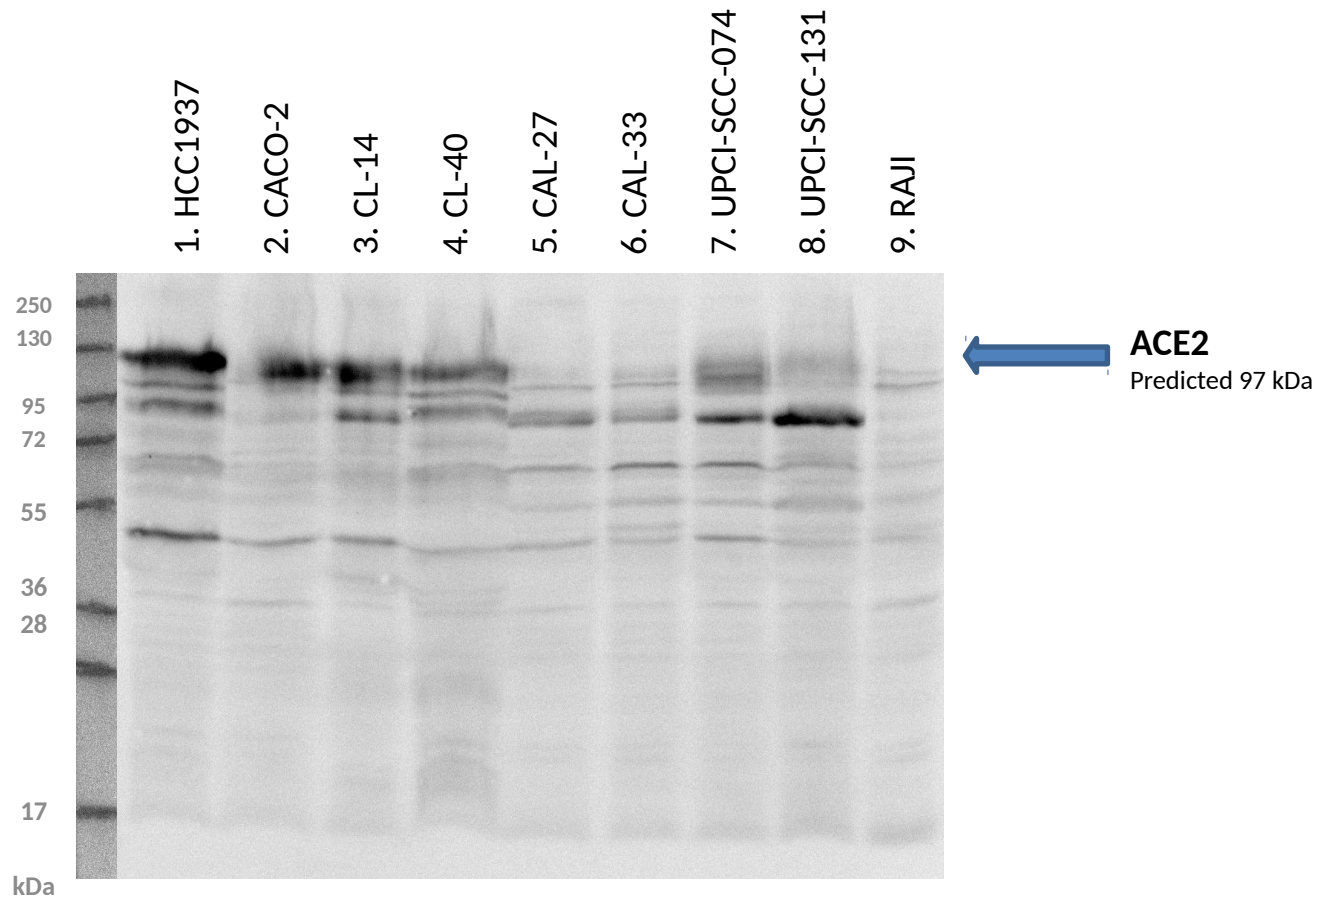

**Anti ACE2**

Abcam ab 15348

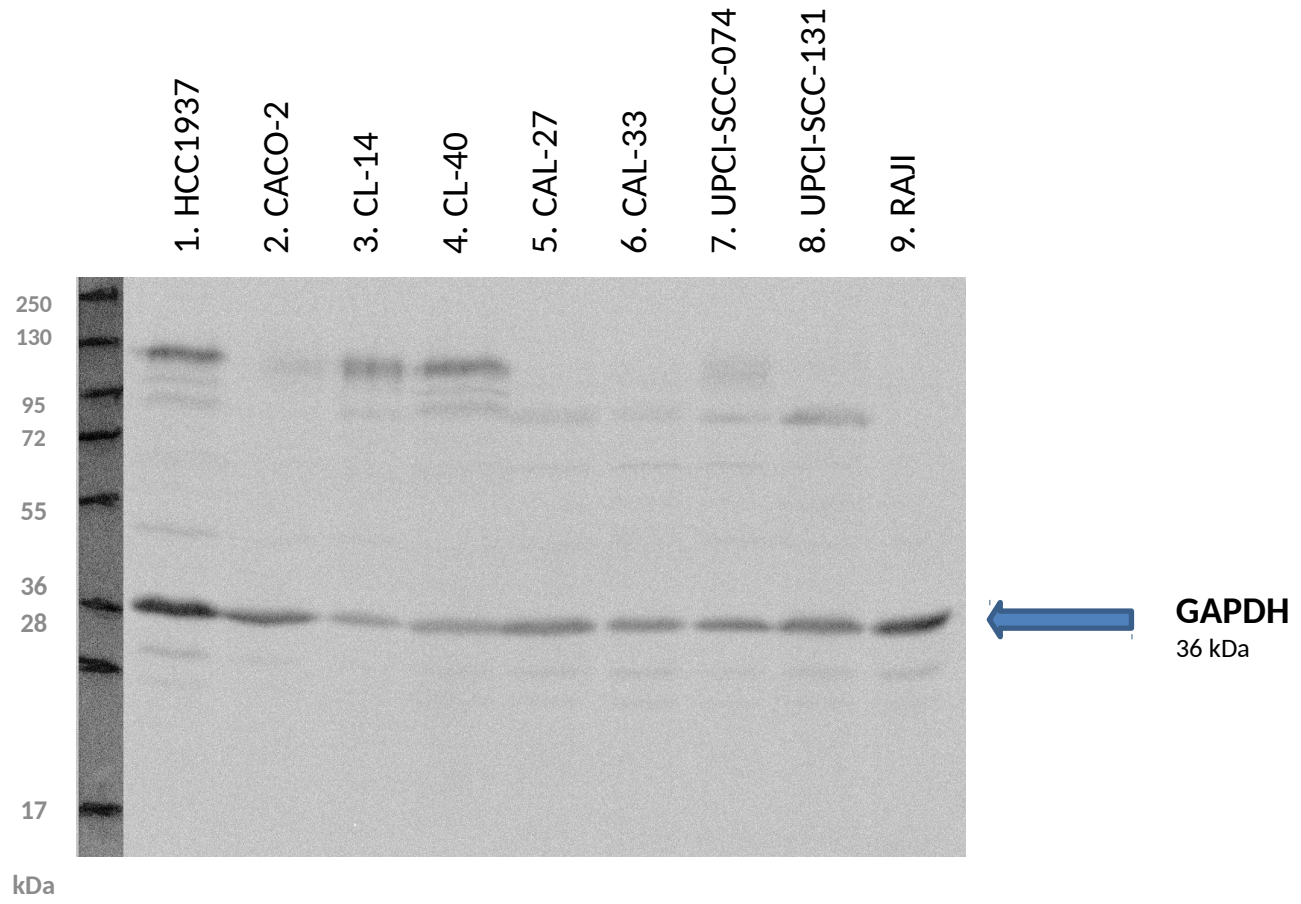

For ACE2

Anti GAPDH

Abcam ab 8245

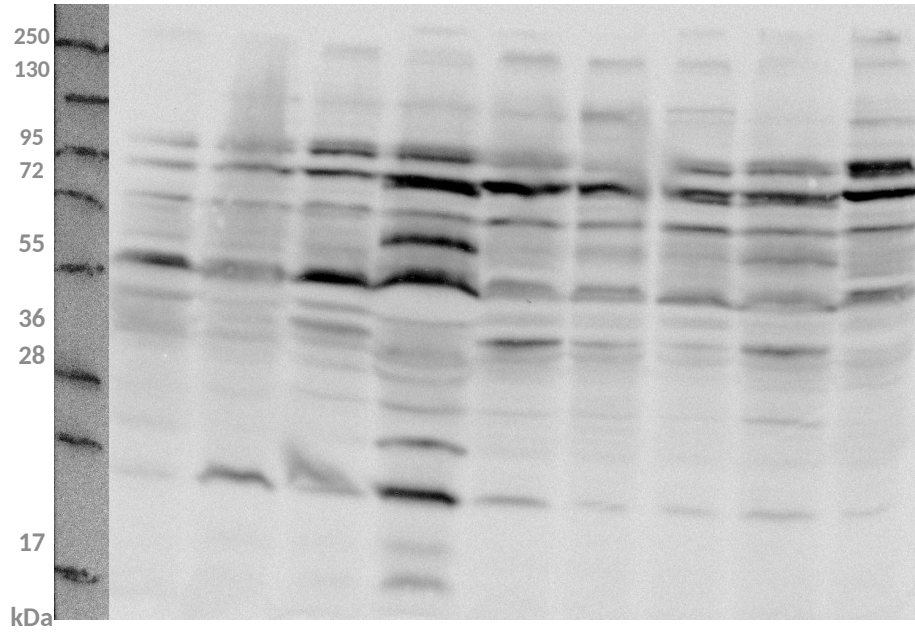

1. HCC1937

2. CACO-2

3. CL-14

4. CL-40

5. CAL-27

6. CAL-33

7. UPCI-SCC-074

8. UPCI-SCC-131

9. RAJI

250  
130  
95  
72  
55  
36  
28  
17  
kDa

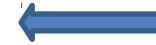

**TMPRSS2**

55 kDa

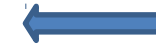

Cleavage Fragment

**Anti TMPRSS2**

Abcam ab 109131

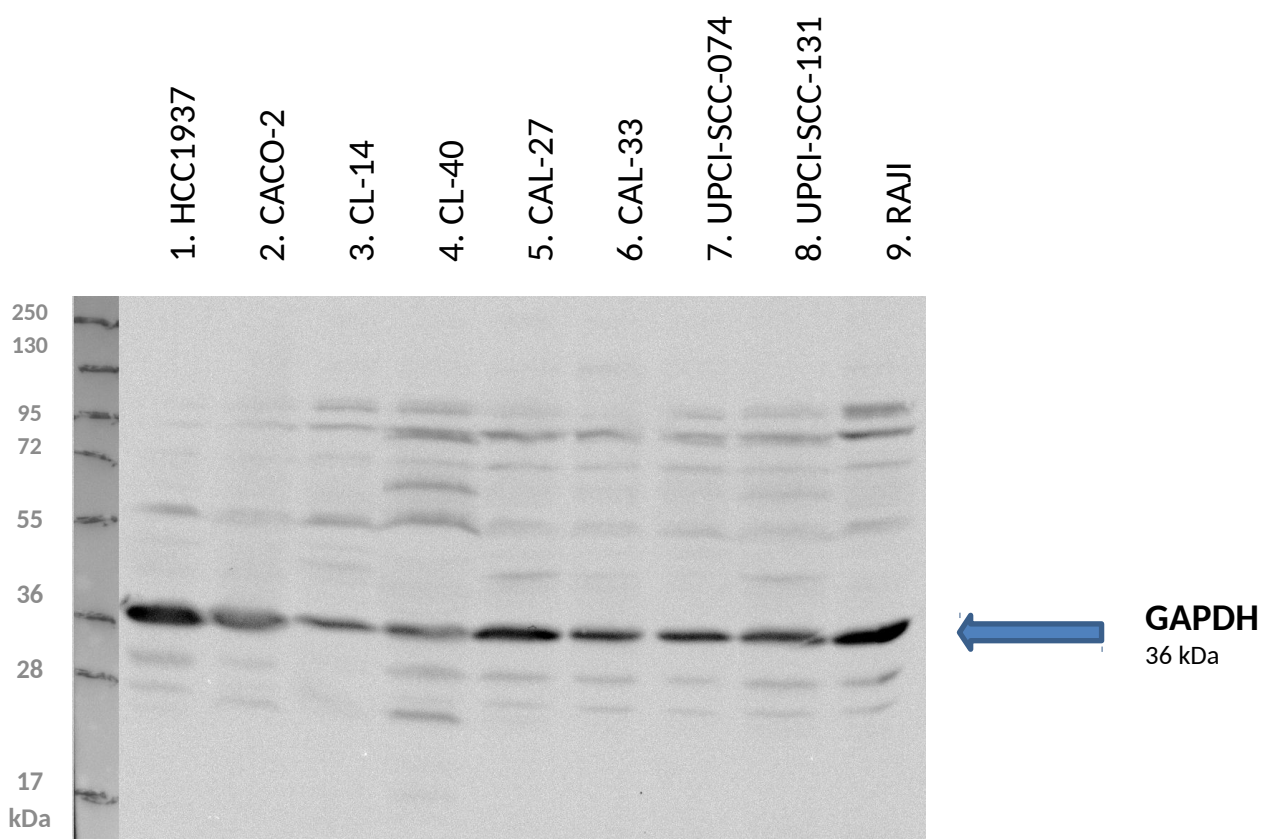

For TMPRSS2

Anti GAPDH

Abcam ab 8245
